# Supplementary material for: Interactions between Drosophila and its natural yeast symbionts—Is Saccharomyces cerevisiae a good model for studying the fly-yeast relationship?
Source: PeerJ. 2015 Aug 25;3:e1116. doi: 10.7717/peerj.1116 (PMC4556146; doi:10.7717/peerj.1116)
Supplement: Data S1 — Values are the number of CFUs per fly after correcting for the dilution factor, the volume plated, and the number of flies per sample. [file peerj-03-1116-s005.xlsx]

## Sheet: HO-48
	H. occidentalis	A	B	C	Dilution
	0	TMTC	TMTC	TMTC	100
	24	550	289	327	10
	48	530	417	178	1
	S. cerevisiae	A	B	C	Dilution
	0	TMTC	TMTC	TMTC	1000
	24	417	1	37	10
	48	0	10	7	1
		TMTC=Too Many Too Count
	Y1 H. uvarum	Y17 H.u	S. cerevisiae	No yeast
	123333333	920000	773333	100000
	1.77667e+06	1.01667e+06	116000	0
	21633.3	140000	1033.33	0
Averages
0
24	Y1 H. uvarum	Y17 H.u	S. cerevisiae	No yeast
48	14571662	14000000	1.20139e+06	100
	640495	429224	38935.8	0
	10715.6	81853.5	251.661	0
Standard Dev
0
24
48
	Y2 S. paradoxus	S. cerevisiae	No Yeast
	5633.33	1.60333e+06	0
	74333.3	40000	0
	1100	0	0
Averages
0
24	Y2 S. paradoxus	S. cerevisiae	No Yeast
48	1985.78	495412	0
	90633	23094	0
	818.535	0	0
Standard Dev
0
24
48

## Sheet: HO-72
	H. occidentalis	A	B	C	Dilution
	0	564	490	520	1000
	24	541	524	929	100
	48	390	63	115	100
	72	415	457	527	10
	S. cerevisiae	A	B	C	Dilution
	0	297	330	364	100
	24	582	120	322	1
	48	6	8	1	1
	72	5	0	0	1
	Y1 H. uvarum	Y17 H.u	S. cerevisiae	No yeast
	123333333	920000	773333	100000
	1.77667e+06	1.01667e+06	116000	0
Averages	21633.3	140000	1033.33	0
0
24
48	Y1 H. uvarum	Y17 H.u	S. cerevisiae	No yeast
	14571662	14000000	1.20139e+06	100
	640495	429224	38935.8	0
Standard Dev	10715.6	81853.5	251.661	0
0
24
48
	Y2 S. paradoxus	S. cerevisiae	No Yeast
	5633.33	1.60333e+06	0
	74333.3	40000	0
Averages	1100	0	0
0
24
48	Y2 S. paradoxus	S. cerevisiae	No Yeast
	1985.78	495412	0
	90633	23094	0
Standard Dev	818.535	0	0
0
24
48

## Sheet: HU
	H. uvarum strain 1	A	B	C	Dilution
	0	1817	1874	2134	100
	24	98	390	32	100
	48	2	4	2	10
	S. cerevisiae	A	B	C	Dilution
	0	239	335	403	100
	24	715	7	797	1
	48	4	113	0	1
	Y1 H. uvarum	Y17 H.u	S. cerevisiae	No yeast
	123333333	920000	773333	100000
	1.77667e+06	1.01667e+06	116000	0
	21633.3	140000	1033.33	0
Averages
0
24	Y1 H. uvarum	Y17 H.u	S. cerevisiae	No yeast
48	14571662	14000000	1.20139e+06	100
	640495	429224	38935.8	0
	10715.6	81853.5	251.661	0
Standard Dev
0
24
48
	Y2 S. paradoxus	S. cerevisiae	No Yeast
	5633.33	1.60333e+06	0
	74333.3	40000	0
	1100	0	0
Averages
0
24	Y2 S. paradoxus	S. cerevisiae	No Yeast
48	1985.78	495412	0
	90633	23094	0
	818.535	0	0
Standard Dev
0
24
48

## Sheet: SP
	S. paradoxus	A	B	C	Dilution
	0	913	564	501	100
	24	159	269	397	10
	48	0	17	14	1
	S. cerevisiae	A	B	C	Dilution
	0	289	626	430	1000
	24	743	53	438	10
	48	0	1	107	1
	Y1 H. uvarum	Y17 H.u	S. cerevisiae	No yeast
	123333333	920000	773333	100000
	1.77667e+06	1.01667e+06	116000	0
	21633.3	140000	1033.33	0
Averages
0
24	Y1 H. uvarum	Y17 H.u	S. cerevisiae	No yeast
48	14571662	14000000	1.20139e+06	100
	640495	429224	38935.8	0
	10715.6	81853.5	251.661	0
Standard Dev
0
24
48
	Y2 S. paradoxus	S. cerevisiae	No Yeast
	5633.33	1.60333e+06	0
	74333.3	40000	0
	1100	0	0
Averages
0
24	Y2 S. paradoxus	S. cerevisiae	No Yeast
48	1985.78	495412	0
	90633	23094	0
	818.535	0	0
Standard Dev
0
24
48

## Sheet: BN
	B. naardenensis	A	B	C	Dilution
	0	497	400	593	1000
	24	384	178	284	100
	48	10	10	1	1
	S. cerevisiae	A	B	C	Dilution
	0	2	55	50	1000
	24	41	46	52	100
	48	1	3	2	1
	Y1 H. uvarum	Y17 H.u	S. cerevisiae	No yeast
	123333333	920000	773333	100000
	1.77667e+06	1.01667e+06	116000	0
	21633.3	140000	1033.33	0
Averages
0
24	Y1 H. uvarum	Y17 H.u	S. cerevisiae	No yeast
48	14571662	14000000	1.20139e+06	100
	640495	429224	38935.8	0
	10715.6	81853.5	251.661	0
Standard Dev
0
24
48
	Y2 S. paradoxus	S. cerevisiae	No Yeast
	5633.33	1.60333e+06	0
	74333.3	40000	0
	1100	0	0
Averages
0
24	Y2 S. paradoxus	S. cerevisiae	No Yeast
48	1985.78	495412	0
	90633	23094	0
	818.535	0	0
Standard Dev
0
24
48

## Sheet: DH
	D. hansenii	A	B	C	Dilution
	0	333	444	383	1000
	24	156	256	85	100
	48	166	146	247	1
	S. cerevisiae	A	B	C	Dilution
	0	260	340	380	100
	24	276	501	61	10
	48	0	10	0	1
	Y1 H. uvarum	Y17 H.u	S. cerevisiae	No yeast
	123333333	920000	773333	100000
	1.77667e+06	1.01667e+06	116000	0
	21633.3	140000	1033.33	0
Averages
0
24	Y1 H. uvarum	Y17 H.u	S. cerevisiae	No yeast
48	14571662	14000000	1.20139e+06	100
	640495	429224	38935.8	0
	10715.6	81853.5	251.661	0
Standard Dev
0
24
48
	Y2 S. paradoxus	S. cerevisiae	No Yeast
	5633.33	1.60333e+06	0
	74333.3	40000	0
	1100	0	0
Averages
0
24	Y2 S. paradoxus	S. cerevisiae	No Yeast
48	1985.78	495412	0
	90633	23094	0
	818.535	0	0
Standard Dev
0
24
48
