# Supplementary material for: Interactions between Drosophila and its natural yeast symbionts—Is Saccharomyces cerevisiae a good model for studying the fly-yeast relationship?
Source: PeerJ. 2015 Aug 25;3:e1116. doi: 10.7717/peerj.1116 (PMC4556146; doi:10.7717/peerj.1116)
Supplement: Data S2 [file peerj-03-1116-s006.xlsx]

## Sheet: 8.8.14 to 8.11.14
													Time (s)	Time (H)		SP-R1	SP-R2	SP-R3		SP+H202-R1	SP+H202-R2	SP+H202-R3		DH-R1	DH-R2	DH-R3		DH+H202-R1	DH+H202-R2	DH+H202-R3			BN-R1	BN-R2	BN-R3		BN+H202-R1	BN+H202-R2	BN+H202-R3		HU-R1	HU-R2	HU-R3		HU+H202-R1	HU+H202-R2	HU+H202-R3		HO-R1
Dates: 8/8/2014 to 8/11/2014													0	0		0.2049	0.2201	0.2895		0.1865	0.2201	0.2581		0.3476	0.3609	0.3446		0.323	0.467	0.3767			0.3512	0.4032	0.3655		0.3704	0.3584	0.3877		0.3189	0.3241	0.3013		0.3823	0.3217	0.3342		0.4037
													2190.2	0.608389		0.2172	0.218	0.2392		0.1989	0.2178	0.2407		0.356	0.3416	0.3312		0.4877	0.7	0.4129			0.3693	0.3682	0.3443		0.4026	0.3793	0.4705		0.2963	0.3124	0.309		0.3012	0.3328	0.3241		0.3469
													4380.4	1.21678		0.2193	0.2051	0.23		0.1972	0.2104	0.2343		0.3633	0.3331	0.3222		0.5011	0.4168	0.3253			0.3733	0.3631	0.3412		0.4069	0.416	0.4245		0.3132	0.3374	0.3314		0.2858	0.3196	0.319		0.3539
Application: Tecan i-control				Tecan i-control , 1.9.17.0									6570.6	1.82517		0.2294	0.217	0.2416		0.1972	0.2106	0.2374		0.3789	0.3399	0.3329		0.5296	0.3415	0.3216			0.3935	0.3846	0.3707		0.3584	0.3245	0.4176		0.3516	0.3867	0.3716		0.2864	0.3112	0.3201		0.4122
Device: infinite 200				Serial number: 908006434				Serial number of connected stacker:					8760.8	2.43356		0.2392	0.2229	0.2523		0.1969	0.2094	0.2346		0.4156	0.3482	0.3533		0.5189	0.3334	0.3133			0.4187	0.4045	0.3995		0.387	0.3228	0.4104		0.4056	0.4552	0.4244		0.2863	0.3125	0.3153		0.4888
Firmware: V_2.11_04/08_InfiniTe (Apr 4 2008/14.37.11)				MAI, V_2.11_04/08_InfiniTe (Apr 4 2008/14.37.11)									10951	3.04194		0.2551	0.2394	0.2684		0.1973	0.2151	0.2386		0.4444	0.3833	0.4002		0.5272	0.3338	0.3135			0.4448	0.4287	0.4371		0.3461	0.3231	0.4122		0.4913	0.5511	0.505		0.291	0.3189	0.3201		0.5891
													13141.2	3.65033		0.2695	0.2465	0.2851		0.1948	0.2111	0.2353		0.4736	0.4139	0.4397		0.418	0.3237	0.3022			0.4707	0.4494	0.4648		0.3169	0.3119	0.4061		0.5891	0.6539	0.5849		0.2853	0.3144	0.3065		0.6984
Date:	2014-08-08												15331.3	4.25869		0.2921	0.2593	0.3048		0.198	0.2102	0.2397		0.507	0.4661	0.5039		0.4176	0.3258	0.3037			0.499	0.472	0.4971		0.315	0.3127	0.4098		0.699	0.7701	0.6898		0.2867	0.3166	0.3094		0.8106
Time:	12:42:52 PM												17521.5	4.86708		0.3171	0.2762	0.3284		0.1972	0.2124	0.2398		0.5473	0.5346	0.5528		0.2807	0.323	0.3015			0.5203	0.494	0.5281		0.3151	0.3096	0.4094		0.8335	0.895	0.8113		0.2858	0.3143	0.3045		0.9906
													19711.7	5.47547		0.338	0.2885	0.3505		0.1965	0.2112	0.2376		0.5796	0.5968	0.6006		0.2758	0.3181	0.2948			0.5491	0.5215	0.5609		0.3146	0.3019	0.3004		0.976	1.0275	0.9518		0.2827	0.3097	0.2994		1.1193
													21901.9	6.08386		0.369	0.3138	0.3832		0.1987	0.2105	0.2402		0.6184	0.6712	0.6567		0.2791	0.3233	0.2989			0.5845	0.5553	0.5971		0.3188	0.3046	0.3026		1.1675	1.165	1.1296		0.2859	0.3142	0.3018		1.2297
System				TECANUSER-PC									24092.1	6.69225		0.3981	0.3313	0.4118		0.1953	0.2083	0.236		0.655	0.7421	0.7004		0.2732	0.3173	0.2916			0.6163	0.5859	0.6276		0.3144	0.297	0.2971		1.2614	1.2627	1.233		0.2803	0.3028	0.2949		1.2973
User				TecanUser-PC\Tecan User									26282.3	7.30064		0.4373	0.3637	0.4431		0.1983	0.2138	0.24		0.6933	0.8056	0.7513		0.2769	0.3233	0.2955			0.6576	0.6298	0.6738		0.3193	0.3033	0.3038		1.3093	1.2951	1.2871		0.284	0.3066	0.2999		1.3427
Plate				Corning 96 Flat Bottom Transparent Polystyrol [COS96ft.pdfx]									28472.5	7.90903		0.4731	0.3837	0.4762		0.1953	0.2095	0.2371		0.7112	0.8349	0.7974		0.2712	0.3186	0.2882			0.6878	0.6571	0.699		0.3144	0.2966	0.2994		1.3232	1.3119	1.3082		0.279	0.3076	0.292		1.3606
Plate-ID (Stacker)													30662.7	8.51742		0.5155	0.4132	0.5154		0.1968	0.2158	0.2393		0.7294	0.8872	0.8415		0.2754	0.3238	0.2931			0.7242	0.6939	0.733		0.3159	0.3	0.3021		1.3353	1.3288	1.3188		0.2816	0.3031	0.2982		1.3726
													32852.9	9.12581		0.5493	0.432	0.5499		0.1954	0.2099	0.2382		0.7962	0.9284	0.8791		0.2726	0.3214	0.2922			0.7527	0.7217	0.7608		0.3142	0.2956	0.3001		1.3421	1.3386	1.3247		0.2789	0.3024	0.2933		1.3756
Wait (Plate)				On	Target Temperature: 27 °C								35043	9.73417		0.5658	0.4456	0.5668		0.1954	0.2146	0.2402		0.831	0.9712	0.921		0.2738	0.3244	0.2927			0.7818	0.7519	0.7878		0.3163	0.2952	0.3004		1.3481	1.3446	1.3297		0.2806	0.308	0.2946		1.3768
													37233.2	10.3426		0.5709	0.4492	0.5724		0.194	0.2124	0.2391		0.8636	1.0085	0.9505		0.274	0.3235	0.2902			0.808	0.7826	0.8117		0.3148	0.2949	0.3004		1.3512	1.3487	1.332		0.2803	0.3023	0.2942		1.3771
Wait (Plate Temperature)				Valid Range: 26.4 - 27.5 °C									39423.4	10.9509		0.5731	0.4509	0.5761		0.1945	0.2088	0.2395		0.8868	1.0365	0.9819		0.273	0.3245	0.2891			0.8348	0.8088	0.8351		0.3114	0.2872	0.2994		1.3508	1.3473	1.3323		0.2777	0.3029	0.2908		1.3728
													41613.6	11.5593		0.5801	0.4532	0.5822		0.1969	0.2112	0.2396		0.9243	1.0712	1.0184		0.2748	0.3284	0.2892			0.8644	0.834	0.8622		0.3024	0.2863	0.2982		1.3532	1.3494	1.334		0.2789	0.3023	0.292		1.3718
List of actions in this measurement script:													43803.8	12.1677		0.5811	0.4546	0.5856		0.1949	0.2115	0.2382		0.964	1.1066	1.0497		0.2729	0.3286	0.2896			0.8893	0.8584	0.8823		0.3009	0.2843	0.298		1.3521	1.3461	1.3322		0.2767	0.2991	0.2901		1.3697
Kinetic													45994	12.7761		0.5862	0.4587	0.5903		0.1951	0.212	0.2384		1.0064	1.1405	1.0957		0.2732	0.3291	0.2868			0.9148	0.8911	0.8996		0.2994	0.2837	0.2963		1.3523	1.3464	1.3329		0.2765	0.303	0.2884		1.3684
Absorbance													48184.2	13.3845		0.5865	0.4586	0.5925		0.1943	0.2115	0.2371		1.0433	1.1768	1.1247		0.2723	0.3305	0.2855			0.9367	0.911	0.9134		0.2988	0.2838	0.2957		1.3504	1.3434	1.3298		0.2766	0.2978	0.2867		1.3642
Incubation Time				00:30:00 (hh:mm:ss) includes 2 shaking and 0 waiting times.									50374.4	13.9929		0.5906	0.4637	0.5956		0.1936	0.2109	0.2375		1.0781	1.2092	1.1638		0.2734	0.3333	0.283			0.9577	0.9397	0.9276		0.2968	0.2842	0.2959		1.3499	1.3437	1.3315		0.2759	0.2998	0.2877		1.3618
				Shaking 795 sec. Amplitude:2.5mm, Mode: Orbital									52564.6	14.6013		0.5906	0.4623	0.5952		0.1906	0.205	0.2352		1.1053	1.2393	1.2034		0.2696	0.3319	0.2832			0.9684	0.9442	0.9212		0.2952	0.2796	0.2933		1.3476	1.3396	1.328		0.2727	0.2953	0.2826		1.3552
				Shaking 1000 sec. Amplitude:2.5mm, Mode: Orbital									54754.7	15.2096		0.5958	0.4682	0.5993		0.1914	0.2081	0.2353		1.138	1.2761	1.2544		0.2719	0.338	0.2845			0.9917	0.9738	0.9428		0.293	0.2801	0.2924		1.3482	1.3407	1.3309		0.273	0.2934	0.283		1.3551
				Remaining Wait Time									56944.9	15.818		0.5968	0.4681	0.5996		0.1904	0.2068	0.2326		1.1606	1.3021	1.2974		0.2704	0.3378	0.2835			1.003	0.9517	0.9418		0.2897	0.2761	0.2883		1.3456	1.3375	1.3267		0.2694	0.2917	0.2773		1.3494
													59135.1	16.4264		0.6033	0.4774	0.607		0.1917	0.2097	0.2343		1.1871	1.3339	1.3432		0.2731	0.3473	0.2925			1.011	0.9789	0.9548		0.2912	0.2799	0.291		1.3479	1.3396	1.3297		0.2728	0.2937	0.2825		1.3489
													61325.3	17.0348		0.6064	0.4798	0.6097		0.1899	0.2092	0.233		1.2113	1.3673	1.3833		0.2717	0.349	0.2999			1.0185	0.9771	0.9562		0.292	0.2796	0.2893		1.3461	1.3378	1.3279		0.2711	0.2942	0.2804		1.3472
Label: Label3													63515.5	17.6432		0.6108	0.4862	0.6154		0.1907	0.2066	0.2333		1.237	1.3977	1.4212		0.2718	0.3585	0.3113			1.0263	0.9915	0.9561		0.2913	0.2793	0.2888		1.3481	1.3383	1.3291		0.273	0.2905	0.28		1.3469
Kinetic Measurement													65705.7	18.2516		0.6133	0.4888	0.6167		0.1896	0.2086	0.232		1.2556	1.4206	1.4532		0.2691	0.3711	0.3257			1.0343	1.0317	0.9647		0.2891	0.2778	0.288		1.347	1.3369	1.3285		0.2715	0.2921	0.2779		1.345
Kinetic Cycles				142									67895.9	18.86		0.6213	0.4962	0.6244		0.1891	0.2105	0.2324		1.2839	1.4487	1.4883		0.2696	0.3775	0.3396			1.0444	1.0312	0.974		0.2881	0.2767	0.2871		1.3486	1.3393	1.3299		0.2745	0.2943	0.2798		1.346
Interval Time				Minimal									70086.1	19.4684		0.6245	0.4983	0.6295		0.1894	0.2091	0.2307		1.3077	1.4745	1.5157		0.2676	0.3796	0.3538			1.0499	1.042	0.9763		0.286	0.2753	0.2845		1.3471	1.3363	1.3279		0.2733	0.2946	0.2762		1.3415
Mode				Absorbance									72276.2	20.0767		0.6319	0.5078	0.6341		0.188	0.204	0.2318		1.3347	1.4957	1.5413		0.2676	0.3896	0.3711			1.0619	1.0623	0.9898		0.2877	0.2772	0.2851		1.3499	1.3398	1.3298		0.2788	0.2965	0.2786		1.3443
Multiple Reads per Well (Square (filled))				3 x 3									74466.4	20.6851		0.6393	0.5173	0.6372		0.1896	0.2077	0.2332		1.3616	1.5149	1.5667		0.2682	0.3965	0.3911			1.0664	1.0631	0.9939		0.2869	0.2782	0.2865		1.35	1.3399	1.3313		0.2844	0.3006	0.2811		1.3436
Multiple Reads per Well (Border)				1150	µm								76656.6	21.2935		0.6444	0.5192	0.6439		0.1891	0.2058	0.2318		1.3861	1.5256	1.5908		0.2663	0.4053	0.411			1.0778	1.0497	0.9974		0.2866	0.2759	0.2832		1.3511	1.3402	1.331		0.2862	0.3036	0.2796		1.3437
Wavelength				595	nm								78846.8	21.9019		0.6504	0.5272	0.6474		0.1858	0.205	0.2297		1.4074	1.5436	1.6097		0.2634	0.4302	0.4329			1.077	1.0441	1.0036		0.2814	0.2734	0.2795		1.3499	1.3386	1.3305		0.2923	0.3089	0.2753		1.3416
Bandwidth				9	nm								81037	22.5103		0.6599	0.5378	0.6545		0.1887	0.2093	0.2323		1.4328	1.5527	1.6334		0.2674	0.4526	0.4612			1.0859	1.0685	1.0125		0.2835	0.277	0.282		1.3533	1.3421	1.3335		0.309	0.3235	0.282		1.3449
Number of Flashes				25									83227.2	23.1187		0.6669	0.5474	0.6593		0.1879	0.2076	0.2332		1.4536	1.5655	1.6501		0.2666	0.4755	0.4926			1.0867	1.0641	1.0154		0.2832	0.2758	0.2805		1.3526	1.3424	1.3335		0.3248	0.3342	0.2814		1.3438
Settle Time				0	ms								85417.4	23.7271		0.671	0.5456	0.6644		0.1854	0.2052	0.2302		1.4744	1.5732	1.6655		0.2644	0.497	0.5212			1.0839	1.0687	1.0195		0.2807	0.2734	0.2756		1.3507	1.3403	1.3328		0.3461	0.3459	0.28		1.3425
Part of Plate				B2-G11									87607.6	24.3354		0.678	0.5533	0.6714		0.1856	0.206	0.2293		1.4935	1.5804	1.6743		0.2645	0.5312	0.5601			1.1018	1.0721	1.0265		0.2785	0.2724	0.2728		1.3522	1.3411	1.332		0.3802	0.3758	0.2832		1.3441
Start Time:	8/8/2014 12:45:53 PM												89797.8	24.9438		0.6847	0.5565	0.678		0.1854	0.2044	0.2294		1.5116	1.5906	1.6862		0.264	0.5749	0.6047			1.1072	1.0596	1.0305		0.278	0.2716	0.2718		1.3522	1.3408	1.3324		0.4184	0.4056	0.2885		1.343
													91988	25.5522		0.6904	0.5642	0.6837		0.1836	0.2021	0.2281		1.5274	1.5979	1.7037		0.2639	0.6054	0.6493			1.1112	1.0812	1.0374		0.2762	0.2696	0.2692		1.3531	1.3421	1.3315		0.4954	0.4584	0.3009		1.3436
													94178.1	26.1606		0.6972	0.5746	0.6909		0.1844	0.2041	0.2282		1.5428	1.6044	1.7053		0.2654	0.638	0.6943			1.1287	1.0874	1.0544		0.2748	0.2685	0.2676		1.352	1.3417	1.3316		0.5634	0.5134	0.3089		1.343
													96368.3	26.769		0.7029	0.5786	0.6915		0.1843	0.2039	0.2277		1.5548	1.6133	1.7033		0.2675	0.6767	0.7364			1.1318	1.091	1.0547		0.275	0.2679	0.2661		1.3525	1.3415	1.3316		0.6451	0.5889	0.3275		1.3436
													98558.5	27.3774		0.7076	0.5905	0.6951		0.1831	0.204	0.2266		1.5647	1.6192	1.7048		0.2693	0.7182	0.782			1.1469	1.1112	1.0657		0.2728	0.2669	0.2648		1.3529	1.3426	1.3316		0.7495	0.6761	0.3471		1.3427
													100749	27.9857		0.7151	0.5896	0.7134		0.1841	0.2029	0.2275		1.5742	1.6236	1.707		0.2714	0.7593	0.8267			1.1354	1.1272	1.0714		0.2717	0.2661	0.2638		1.3544	1.344	1.3315		0.859	0.7788	0.3849		1.3436
													102939	28.5941		0.7193	0.5959	0.7159		0.1826	0.2027	0.2264		1.5839	1.6269	1.7068		0.2727	0.8054	0.8711			1.052	1.1437	1.0755		0.2698	0.2652	0.262		1.3535	1.3435	1.3304		0.9791	0.8938	0.4308		1.3428
													105130	29.2027		0.7239	0.6005	0.7195		0.182	0.203	0.2262		1.5972	1.632	1.7045		0.2756	0.8558	0.9171			1.0631	1.1528	1.0742		0.2687	0.2652	0.2606		1.3537	1.3437	1.3308		1.1007	1.017	0.4932		1.3428
													107320	29.8111		0.7299	0.6049	0.724		0.1822	0.2005	0.2258		1.5139	1.6349	1.7041		0.2793	0.8927	0.9634			1.0707	1.1695	1.075		0.2658	0.2636	0.2594		1.3546	1.3437	1.3306		1.2089	1.1478	0.5664		1.3434
													109510	30.4194		0.735	0.6095	0.7273		0.1821	0.2014	0.225		1.6312	1.6376	1.7068		0.2842	0.9103	0.9941			1.0803	1.1852	1.0612		0.2652	0.2639	0.2584		1.3553	1.3444	1.33		1.2282	1.2721	0.6555		1.3441
													111700	31.0278		0.7404	0.6095	0.7301		0.1804	0.1997	0.2229		1.6562	1.6375	1.7052		0.2882	0.9436	1.0307			1.0863	1.1936	1.0689		0.2615	0.2606	0.254		1.3536	1.3419	1.3288		1.2311	1.3073	0.7635		1.3414
													113890	31.6362		0.7453	0.6171	0.7326		0.1798	0.1978	0.222		1.6679	1.639	1.7039		0.2951	0.9823	1.0718			1.0937	1.2158	1.1081		0.2598	0.2592	0.2525		1.3531	1.3412	1.3266		1.2372	1.3131	0.8708		1.3397
													116081	32.2446		0.7552	0.6221	0.738		0.1802	0.2008	0.2233		1.6814	1.6422	1.7058		0.3064	1.0108	1.1059			1.0967	1.2167	1.1162		0.2596	0.2607	0.2544		1.3536	1.3435	1.3287		1.247	1.3248	0.9837		1.3428
													118271	32.853		0.7616	0.6306	0.7392		0.1806	0.2013	0.2242		1.6937	1.6423	1.7097		0.3175	1.026	1.1371			1.1032	1.2518	1.1072		0.2579	0.261	0.2537		1.3542	1.3423	1.3288		1.2519	1.3333	1.0975		1.3422
													120461	33.4614		0.7645	0.6335	0.743		0.1805	0.1995	0.2243		1.7037	1.6451	1.7112		0.3317	1.0768	1.159			1.1078	1.2597	1.0987		0.257	0.2609	0.2537		1.3545	1.3427	1.3292		1.2576	1.3416	1.1982		1.3408
													122651	34.0697		0.7675	0.6417	0.7348		0.1805	0.199	0.2234		1.7149	1.6456	1.7119		0.3479	1.1112	1.1905			1.1088	1.2534	1.1342		0.256	0.2616	0.2526		1.355	1.3412	1.3292		1.2614	1.3465	1.2193		1.3405
													124841	34.6781		0.7794	0.6438	0.7327		0.1801	0.1982	0.2229		1.7658	1.647	1.7135		0.3698	1.1233	1.2047			1.1138	1.2616	1.1529		0.2542	0.2606	0.2508		1.3549	1.3429	1.3287		1.2664	1.3535	1.2232		1.3401
													127032	35.2865		0.7798	0.6485	0.7381		0.1791	0.1982	0.2228		1.7765	1.6467	1.7102		0.3889	1.1796	1.2582			1.1102	1.2897	1.1361		0.2527	0.2592	0.2511		1.3548	1.3413	1.3288		1.2709	1.3583	1.2284		1.3395
													129222	35.8949		0.7943	0.6487	0.7491		0.1787	0.1972	0.2212		1.7816	1.6478	1.7147		0.4175	1.1944	1.2656			1.1061	1.3265	1.1117		0.2496	0.257	0.2475		1.3552	1.3407	1.3268		1.2744	1.3624	1.2326		1.3369
													131412	36.5033		0.7898	0.6539	0.7406		0.1773	0.1993	0.2197		1.7731	1.6481	1.7107		0.4504	1.2158	1.29			1.1047	1.3429	1.1423		0.247	0.2551	0.2457		1.3545	1.34	1.3267		1.2793	1.3689	1.2372		1.3379
													133602	37.1117		0.8073	0.6568	0.7431		0.1772	0.1987	0.2189		1.7798	1.6495	1.712		0.4713	1.2248	1.3145			1.1038	1.3349	1.1678		0.2457	0.2542	0.2452		1.3532	1.3398	1.3256		1.2827	1.3726	1.2411		1.3365
													135792	37.7201		0.8001	0.6588	0.747		0.1767	0.1965	0.2191		1.7776	1.6514	1.7109		0.496	1.2565	1.3298			1.1085	1.3533	1.1737		0.2446	0.2547	0.2446		1.3522	1.3382	1.3261		1.2868	1.3778	1.2443		1.3374
													137982	38.3284		0.8119	0.6696	0.7511		0.1761	0.1958	0.2186		1.7688	1.653	1.7084		0.5234	1.2755	1.3477			1.1003	1.3727	1.1437		0.2443	0.2543	0.2444		1.3527	1.3397	1.3257		1.2906	1.3827	1.2493		1.3374
													140173	38.9368		0.8102	0.6741	0.757		0.1771	0.197	0.22		1.7734	1.6558	1.707		0.5474	1.3077	1.37			1.1021	1.3965	1.1545		0.2428	0.2525	0.2435		1.3543	1.3405	1.3255		1.2959	1.3887	1.2543		1.3376
													142363	39.5452		0.82	0.6818	0.7607		0.1768	0.1973	0.221		1.7458	1.6587	1.7074		0.6016	1.3396	1.3854			1.1045	1.3929	1.1587		0.2432	0.254	0.244		1.355	1.3413	1.3262		1.2996	1.3929	1.2591		1.3388
													144553	40.1536		0.8241	0.6864	0.769		0.1767	0.1976	0.2207		1.7277	1.6614	1.7089		0.6352	1.3626	1.4115			1.0952	1.4043	1.1526		0.2418	0.2539	0.2436		1.3561	1.342	1.3279		1.3045	1.3983	1.2636		1.3409
													146743	40.762		0.827	0.6838	0.767		0.1758	0.1966	0.2199		1.7171	1.6622	1.7088		0.656	1.3673	1.3924			1.0878	1.42	1.1731		0.2417	0.2523	0.2434		1.3562	1.3424	1.3267		1.3079	1.4035	1.2673		1.3407
													148933	41.3704		0.8286	0.6885	0.7752		0.175	0.1953	0.2183		1.714	1.6659	1.7101		0.6783	1.3988	1.4328			1.0702	1.413	1.1716		0.2393	0.2506	0.2417		1.3559	1.3411	1.326		1.312	1.4087	1.2703		1.341
													151124	41.9788		0.8311	0.6944	0.7822		0.1744	0.195	0.2168		1.7078	1.6641	1.7088		0.7108	1.4139	1.437			1.0471	1.4135	1.1913		0.238	0.2488	0.24		1.3555	1.3411	1.325		1.3144	1.4095	1.2724		1.3409
													153314	42.5872		0.8361	0.6972	0.7822		0.1741	0.1946	0.2167		1.7075	1.6673	1.7101		0.7298	1.4107	1.4356			1.0243	1.4199	1.2254		0.2364	0.2487	0.2392		1.3542	1.3401	1.3248		1.3164	1.4146	1.2745		1.3395
													155504	43.1956		0.8322	0.7004	0.7867		0.1743	0.1946	0.2168		1.7067	1.6664	1.7105		0.7631	1.4423	1.4533			1.0049	1.4264	1.2219		0.2367	0.2478	0.2393		1.3547	1.3396	1.3242		1.3186	1.4149	1.2787		1.34
													157694	43.8039		0.8274	0.7062	0.7922		0.175	0.1961	0.2193		1.7051	1.6696	1.7128		0.7843	1.45	1.4522			0.9867	1.4268	1.2461		0.2366	0.2504	0.2417		1.3565	1.3423	1.3256		1.3228	1.4191	1.2832		1.341
													159884	44.4123		0.8347	0.7145	0.7943		0.1748	0.196	0.219		1.7066	1.672	1.7124		0.7997	1.4668	1.4636			0.9732	1.4344	1.2568		0.2365	0.2497	0.2406		1.3572	1.3422	1.3261		1.324	1.4198	1.2864		1.3398
													162074	45.0207		0.8378	0.718	0.7978		0.1742	0.1941	0.2191		1.7058	1.6735	1.7148		0.8349	1.4877	1.4757			0.9725	1.4477	1.2848		0.2356	0.2499	0.2405		1.3571	1.3426	1.3261		1.3274	1.4229	1.2898		1.3414
													164265	45.6291		0.8381	0.7217	0.7976		0.1735	0.196	0.2186		1.7044	1.6752	1.7134		0.856	1.4916	1.4724			0.948	1.4448	1.3136		0.2339	0.249	0.2397		1.3575	1.3439	1.327		1.3283	1.4241	1.292		1.3407
													166455	46.2375		0.8376	0.725	0.8019		0.1735	0.1953	0.218		1.7038	1.6753	1.714		0.8824	1.5011	1.494			0.9427	1.4403	1.3108		0.2329	0.2471	0.2384		1.357	1.3438	1.3271		1.3311	1.4274	1.2935		1.3403
													168645	46.8459		0.8425	0.7277	0.8013		0.1725	0.1938	0.2169		1.7025	1.6773	1.7154		0.9129	1.5087	1.496			0.9355	1.4496	1.3052		0.2314	0.246	0.2379		1.3582	1.3433	1.327		1.3337	1.4291	1.2966		1.341
													170835	47.4542		0.8378	0.7304	0.804		0.1721	0.1935	0.2155		1.7007	1.677	1.7132		0.9476	1.5188	1.5001			0.9192	1.4623	1.3147		0.2307	0.2449	0.2371		1.356	1.3431	1.327		1.3347	1.4316	1.297		1.3411
													173025	48.0626		0.8325	0.7291	0.8073		0.1718	0.1934	0.2161		1.6985	1.6788	1.7167		0.9704	1.526	1.5181			0.9115	1.4585	1.3266		0.2287	0.2431	0.2352		1.3571	1.344	1.3271		1.3381	1.4327	1.2995		1.3414
													175216	48.671		0.8309	0.7261	0.8074		0.1707	0.1932	0.2147		1.697	1.6796	1.7204		0.9981	1.5365	1.516			0.897	1.4546	1.3497		0.2276	0.2421	0.2352		1.3566	1.3437	1.3263		1.3392	1.4348	1.3011		1.3416
													177406	49.2794		0.8267	0.73	0.8102		0.1708	0.1929	0.2145		1.6972	1.6791	1.7192		1.0214	1.537	1.5167			0.8771	1.4579	1.364		0.2267	0.2425	0.2342		1.3568	1.3435	1.3259		1.3415	1.4366	1.3027		1.3405
													179596	49.8878		0.8282	0.735	0.8125		0.1701	0.1915	0.2131		1.6957	1.6804	1.7268		1.053	1.547	1.5314			0.8809	1.4633	1.3829		0.2258	0.241	0.234		1.3564	1.3431	1.3264		1.3449	1.4409	1.3049		1.3406
													181786	50.4962		0.8226	0.7292	0.8133		0.1696	0.1911	0.2132		1.6934	1.6827	1.7303		1.0711	1.5519	1.5452			0.8712	1.4694	1.3928		0.2246	0.2403	0.233		1.3561	1.343	1.327		1.3485	1.4439	1.3092		1.3409
													183976	51.1046		0.8251	0.7263	0.8163		0.1704	0.1919	0.214		1.6908	1.684	1.7251		1.0926	1.5588	1.5446			0.871	1.4719	1.4125		0.2253	0.2414	0.2335		1.3569	1.3438	1.327		1.3527	1.4477	1.3144		1.3395
													186167	51.713		0.8293	0.7334	0.821		0.1707	0.1924	0.2155		1.6923	1.6866	1.7276		1.1164	1.5676	1.5539			0.8704	1.4762	1.4073		0.2249	0.2422	0.2347		1.3593	1.3453	1.3296		1.3583	1.4546	1.3205		1.3437
													188357	52.3214		0.8229	0.7308	0.8216		0.1701	0.1921	0.2142		1.688	1.6878	1.7329		1.1352	1.5712	1.5587			1.1	1.4637	1.4181		0.2247	0.2406	0.2338		1.3586	1.3461	1.3309		1.3603	1.4562	1.3235		1.3439
													190547	52.9297		0.8128	0.7255	0.8224		0.169	0.191	0.2125		1.6859	1.6871	1.7257		1.1519	1.5766	1.5632			1.1593	1.463	1.4402		0.2217	0.2385	0.2319		1.3582	1.346	1.3312		1.3633	1.458	1.3261		1.3437
													192737	53.5381		0.8165	0.7236	0.8211		0.1682	0.1907	0.2129		1.6846	1.6879	1.7242		1.171	1.5782	1.5674			1.2171	1.4859	1.4413		0.221	0.2377	0.2313		1.3592	1.3462	1.3313		1.3666	1.4604	1.3277		1.345
													194927	54.1465		0.8182	0.729	0.8235		0.1685	0.1897	0.2122		1.6819	1.6893	1.7243		1.1914	1.5834	1.5711			1.222	1.4807	1.4475		0.2207	0.2374	0.2308		1.3587	1.3469	1.3321		1.3681	1.4612	1.3287		1.3434
													197118	54.7549		0.8162	0.7242	0.8263		0.168	0.1908	0.2122		1.6803	1.6898	1.725		1.2095	1.5863	1.5747			1.1994	1.4786	1.4495		0.22	0.2366	0.2295		1.3593	1.3475	1.3313		1.3697	1.4616	1.3309		1.3436
													199308	55.3633		0.8091	0.7236	0.827		0.1676	0.1908	0.2119		1.6786	1.6926	1.7236		1.2322	1.5909	1.5772			1.2009	1.4811	1.4713		0.2199	0.2372	0.2306		1.3594	1.3482	1.3301		1.3703	1.4629	1.3321		1.3421
													201498	55.9717		0.8118	0.7249	0.832		0.1677	0.1905	0.2131		1.6751	1.6933	1.7246		1.2501	1.593	1.5911			1.1875	1.4843	1.4726		0.2186	0.2369	0.23		1.3607	1.3496	1.3268		1.3714	1.462	1.3329		1.3404
													203688	56.5801		0.8133	0.7235	0.8347		0.1678	0.1908	0.2127		1.6741	1.6941	1.7342		1.2669	1.599	1.6038			1.1861	1.4919	1.4779		0.2186	0.2374	0.2304		1.3614	1.3498	1.3235		1.3728	1.4628	1.3324		1.3409
													205878	57.1884		0.8067	0.7229	0.8372		0.1679	0.1918	0.2141		1.6704	1.694	1.7363		1.2849	1.6049	1.6047			1.1898	1.4851	1.4821		0.2193	0.2377	0.231		1.3624	1.352	1.2505		1.3729	1.463	1.3319		1.3409
													208068	57.7968		0.8046	0.7235	0.8393		0.1679	0.1915	0.2138		1.6688	1.6959	1.7355		1.2994	1.6064	1.6102			1.235	1.4916	1.4924		0.2174	0.2374	0.2298		1.364	1.3534	1.2506		1.3728	1.4604	1.3316		1.34
													210259	58.4052		0.7994	0.722	0.841		0.1656	0.1912	0.2147		1.666	1.6954	1.7321		1.3162	1.6103	1.6143			1.2384	1.4891	1.4901		0.2177	0.2371	0.23		1.3647	1.3534	1.2536		1.373	1.46	1.3304		1.341
													212449	59.0136		0.8056	0.7177	0.8433		0.169	0.1925	0.216		1.6638	1.6961	1.7318		1.3285	1.6129	1.6174			1.2235	1.4824	1.4919		0.2164	0.2359	0.2297		1.3659	1.3556	1.2577		1.3724	1.4599	1.3304		1.3416
													214639	59.622		0.7958	0.7152	0.842		0.1652	0.1906	0.2145		1.6603	1.698	1.7366		1.3425	1.6156	1.6201			1.2228	1.4896	1.4958		0.2163	0.2352	0.2292		1.366	1.355	1.2609		1.3716	1.458	1.3282		1.3423
													216829	60.2304		0.7991	0.7154	0.8419		0.1681	0.1899	0.214		1.6567	1.6998	1.7451		1.3566	1.6159	1.6237			1.2186	1.4843	1.5023		0.2152	0.235	0.2284		1.3662	1.3551	1.2651		1.37	1.4562	1.326		1.342
													219020	60.8387		0.8026	0.7126	0.8439		0.1648	0.19	0.2136		1.6542	1.7	1.7477		1.3669	1.6189	1.6293			1.2138	1.4882	1.5057		0.2144	0.2331	0.2268		1.3674	1.3555	1.2684		1.3689	1.4549	1.3256		1.3413
													221210	61.4471		0.7896	0.7056	0.8418		0.1634	0.1893	0.2125		1.6482	1.7005	1.75		1.3741	1.6216	1.6294			1.2145	1.4903	1.5069		0.2137	0.2323	0.2269		1.3679	1.357	1.2704		1.3676	1.4529	1.3234		1.3425
													223400	62.0555		0.7935	0.7034	0.8396		0.1643	0.1886	0.212		1.6472	1.7007	1.7467		1.3871	1.6219	1.625			1.2085	1.4913	1.5083		0.2126	0.2305	0.2249		1.3675	1.357	1.272		1.3658	1.4513	1.3199		1.3417
													225590	62.6639		0.7928	0.7021	0.8353		0.1639	0.1889	0.2125		1.6468	1.7021	1.7424		1.4018	1.6217	1.6325			1.2011	1.4822	1.5101		0.2121	0.2314	0.2257		1.3686	1.358	1.2733		1.366	1.4515	1.3192		1.3409
													227780	63.2723		0.7849	0.7038	0.836		0.1634	0.1896	0.2133		1.6439	1.7036	1.7482		1.4148	1.62	1.6255			1.2005	1.4994	1.5114		0.2122	0.2321	0.2264		1.3697	1.3588	1.275		1.3651	1.4505	1.3192		1.3421
													229970	63.8807		0.7842	0.7052	0.8354		0.163	0.1903	0.2141		1.6436	1.7059	1.752		1.4168	1.6234	1.6374			1.1927	1.4841	1.5196		0.2137	0.2313	0.2271		1.3736	1.3631	1.2747		1.3661	1.4516	1.319		1.3447
													232161	64.4891		0.7963	0.7042	0.8351		0.1638	0.1903	0.2136		1.6411	1.7067	1.7553		1.4278	1.6221	1.6412			1.1929	1.4996	1.5191		0.2136	0.2309	0.2265		1.3738	1.3644	1.2739		1.3661	1.451	1.3196		1.3452
													234351	65.0974		0.7897	0.702	0.8358		0.1633	0.1891	0.213		1.6368	1.7101	1.7528		1.4366	1.6222	1.6472			1.1878	1.4944	1.5202		0.2121	0.2314	0.2263		1.3752	1.3649	1.2731		1.3666	1.4513	1.3188		1.3466
													236541	65.7058		0.7864	0.6962	0.8346		0.1624	0.1894	0.2136		1.6352	1.7104	1.7576		1.4487	1.622	1.6507			1.1843	1.4861	1.5233		0.2111	0.2299	0.2257		1.3753	1.3657	1.271		1.3673	1.4528	1.318		1.3487
													238731	66.3142		0.7848	0.6966	0.8347		0.1626	0.1893	0.2139		1.6343	1.7125	1.7578		1.4535	1.6207	1.6605			1.1803	1.4831	1.5272		0.2116	0.2297	0.2253		1.3776	1.3675	1.2702		1.3669	1.4535	1.3172		1.3486
													240921	66.9226		0.7902	0.6931	0.8324		0.1609	0.1885	0.2128		1.6325	1.7154	1.7515		1.4583	1.619	1.6507			1.1776	1.468	1.5205		0.2113	0.2288	0.2254		1.3794	1.3687	1.2697		1.3678	1.4532	1.3167		1.3495
													243112	67.531		0.7902	0.6946	0.8301		0.162	0.1884	0.2128		1.6298	1.7181	1.7553		1.4779	1.6202	1.658			1.1748	1.467	1.5211		0.2101	0.228	0.2248		1.3811	1.3706	1.2698		1.3678	1.4523	1.3166		1.3506
													245302	68.1394		0.7931	0.6906	0.8278		0.1604	0.1876	0.2116		1.6269	1.7169	1.7633		1.4893	1.6171	1.6569			1.1709	1.4715	1.5215		0.2102	0.2279	0.2241		1.3826	1.3709	1.2678		1.3664	1.4525	1.3156		1.3499
													247492	68.7477		0.7855	0.6898	0.8164		0.1614	0.1875	0.2123		1.6238	1.7204	1.7589		1.4979	1.6173	1.6614			1.1616	1.4548	1.5055		0.2101	0.227	0.2238		1.3835	1.3719	1.2684		1.3669	1.4514	1.3145		1.3524
													249682	69.3561		0.7786	0.6916	0.8142		0.1602	0.1873	0.2108		1.6211	1.7227	1.7533		1.5171	1.6164	1.66			1.1632	1.4696	1.5053		0.2094	0.2265	0.2232		1.3855	1.3732	1.2681		1.3672	1.4522	1.3133		1.3526
													251872	69.9645
[truncated: 17 more columns]
