# Supplementary material for: Interactions between Drosophila and its natural yeast symbionts—Is Saccharomyces cerevisiae a good model for studying the fly-yeast relationship?
Source: PeerJ. 2015 Aug 25;3:e1116. doi: 10.7717/peerj.1116 (PMC4556146; doi:10.7717/peerj.1116)
Supplement: Data S3 [file peerj-03-1116-s007.xlsx]

## Sheet: Pilot
2014-04-24
	Red = S. cerevisiae		Blue = S. cerevisiae			Red = S. cerevisiae		Blue = H. occidentalis				R = H. occidentalis		Blue= S. cerevisiae
		Rep 1	Rep 2				Rep 1	Rep 2	Rep 3				Rep 1	Rep 2	Rep 3
	Red	17	19			Red	19	22	16			Red	24	13	16
	Blue	0	0			Blue	17	4	4			Blue	5	8	2
	Both	0	0			Both	4	0	0			Both	0	0	2
	Neither	27	30			Neither	10	24	20			Neither	19	19	24
	Total	44	49			Total	50	50	40			Total	48	40	44

## Sheet: HO
2014-08-22
	Red = S. cerevisiae		Blue = S. cerevisiae					R = H. occidentalis		Blue= H. occidentalis					Red = S. cerevisiae		Blue = H. occidentalis					R = H. occidentalis		Blue= S. cerevisiae
		Rep 1	Rep 2	Rep 3	Rep 4				Rep 1	Rep 2	Rep 3	Rep 4				Rep 1	Rep 2	Rep 3	Rep 4				Rep 1	Rep 2	Rep 3	Rep 4
	Red	10	6	4	12			Red	17	31	27	17			Red	8	1	3	3			Red	29	44	21	33
	Blue	13	22	9	4			Blue	27	20	6	20			Blue	35	28	32	30			Blue	7	1	6	8
	Both	1	0	1	0			Both	2	7	13	0			Both	2	0	0	0			Both	4	0	3	5
	Neither	35	38	38	37			Neither	11	13	15	19			Neither	10	19	20	18			Neither	14	11	17	8
	Total	59	66	52	53			Total	57	71	61	56			Total	55	48	55	51			Total	54	56	47	54

## Sheet: HU
2014-05-15
	Red = S. cerevisiae		Blue = S. cerevisiae					R = H. uvarum		Blue= H. uvarum					Red = S. cerevisiae		Blue = H. uvarum					R = H. uvarum		Blue= S. cerevisiae
		Rep 1	Rep 2	Rep 3	Rep 4				Rep 1	Rep 2	Rep 3	Rep 4				Rep 1	Rep 2	Rep 3					Rep. 1	Rep. 2	Rep. 3	Rep. 4
	Red	12	9	16	6			Red	14	13	21	20			Red	7	10	10				Red	24	30	26	27
	Blue	13	15	18	5			Blue	20	18	21	22			Blue	32	16	18				Blue	6	6	13	7
	Both	2	0	0	0			Both	2	0	1	0			Both	0	7	0				Both	9	4	2	1
	Neither	31	29	29	19			Neither	12	20	15	14			Neither	17	19	19				Neither	5	27	8	8
	Total	58	53	63	30			Total	48	51	58	56			Total	56	52	47				Total	44	67	49	43

## Sheet: SP
2014-08-20
	Red = S. cerevisiae		Blue = S. cerevisiae					R = S. paradoxus		Blue= S. paradoxus					Red = S. cerevisiae		Blue = S. paradoxus					R = S. paradoxus		Blue= S. cerevisiae
		Rep 1	Rep 2	Rep 3	Rep 4				Rep 1	Rep 2	Rep 3	Rep 4				Rep 1	Rep 2	Rep 3	Rep 4				Rep 1	Rep 2	Rep 3	Rep 4
	Red	14	12	12	3			Red	15	3	9	10			Red	6	7	1	8			Red	26	4	6	10
	Blue	14	23	12	28			Blue	16	30	15	17			Blue	27	15	24	23			Blue	4	16	17	7
	Both	3	1	2	1			Both	0	0	2	4			Both	2	1	0	1			Both	0	3	3	3
	Neither	36	20	28	21			Neither	27	30	30	25			Neither	24	32	24	31			Neither	24	28	32	31
	Total	67	56	54	53			Total	58	63	56	56			Total	59	55	49	63			Total	54	51	58	51

## Sheet: DH
2014-08-25
	Red = S. cerevisiae		Blue = S. cerevisiae					R = D. hansenii		Blue= D. hansenii					Red = S. cerevisiae		Blue = D. hansenii					R = D. hansenii		Blue= S. cerevisiae
		Rep 1	Rep 2	Rep 3	Rep 4				Rep 1	Rep 2	Rep 3	Rep 4				Rep 1	Rep 2	Rep 3	Rep 4				Rep 1	Rep 2	Rep 3	Rep 4
	Red	7	9	7	6			Red	9	0	4	9			Red	4	3	7	11			Red	4	10	2	17
	Blue	2	6	21	16			Blue	4	9	14	7			Blue	27	17	4	9			Blue	9	0	7	6
	Both	0	0	0	0			Both	0	0	3	4			Both	0	3	1	0			Both	1	0	0	1
	Neither	22	34	32	39			Neither	37	40	31	32			Neither	27	38	21	36			Neither	41	40	32	23
	Total	31	49	60	61			Total	50	49	52	52			Total	58	61	33	56			Total	55	50	41	47
	This experiment was done concurrently with BN and thus the SC control data is the same

## Sheet: BN
2014-08-25
	Red = S. cerevisiae		Blue = S. cerevisiae					Red = B. naardenensis		Blue = B. naardenensis					Red = S. cerevisiae		Blue = B. naardenensis						R = B. naardenensis		Blue= S. cerevisiae
		Rep 1	Rep 2	Rep 3	Rep 4				Rep 1	Rep 2	Rep 3	Rep 4				Rep 1	Rep 2	Rep 3	Rep 4					Rep 1	Rep 2	Rep 3	Rep 4
	Red	7	9	7	6			Red	13	12	18	11			Red	6	6	6	6				Red	19	17	22	20
	Blue	2	6	21	16			Blue	32	23	4	15			Blue	17	25	7	11				Blue	4	5	0	0
	Both	0	0	0	0			Both	0	1	1	0			Both	0	2	0	0				Both	0	1	1	0
	Neither	22	34	32	39			Neither	16	19	27	27			Neither	45	23	28	27				Neither	24	27	21	36
	Total	31	49	60	61			Total	61	55	50	53			Total	68	56	41	44				Total	47	50	44	56
	This experiment was done concurrently with BN and thus the SC control data is the same
