# Supplementary material for: Interactions betweenDrosophilaand its natural yeast symbionts—IsSaccharomyces cerevisiaea good model for studying the fly-yeast relationship?
Source: PeerJ journal article supplement (doi:10.7717/peerj.1116), 2015-08-25

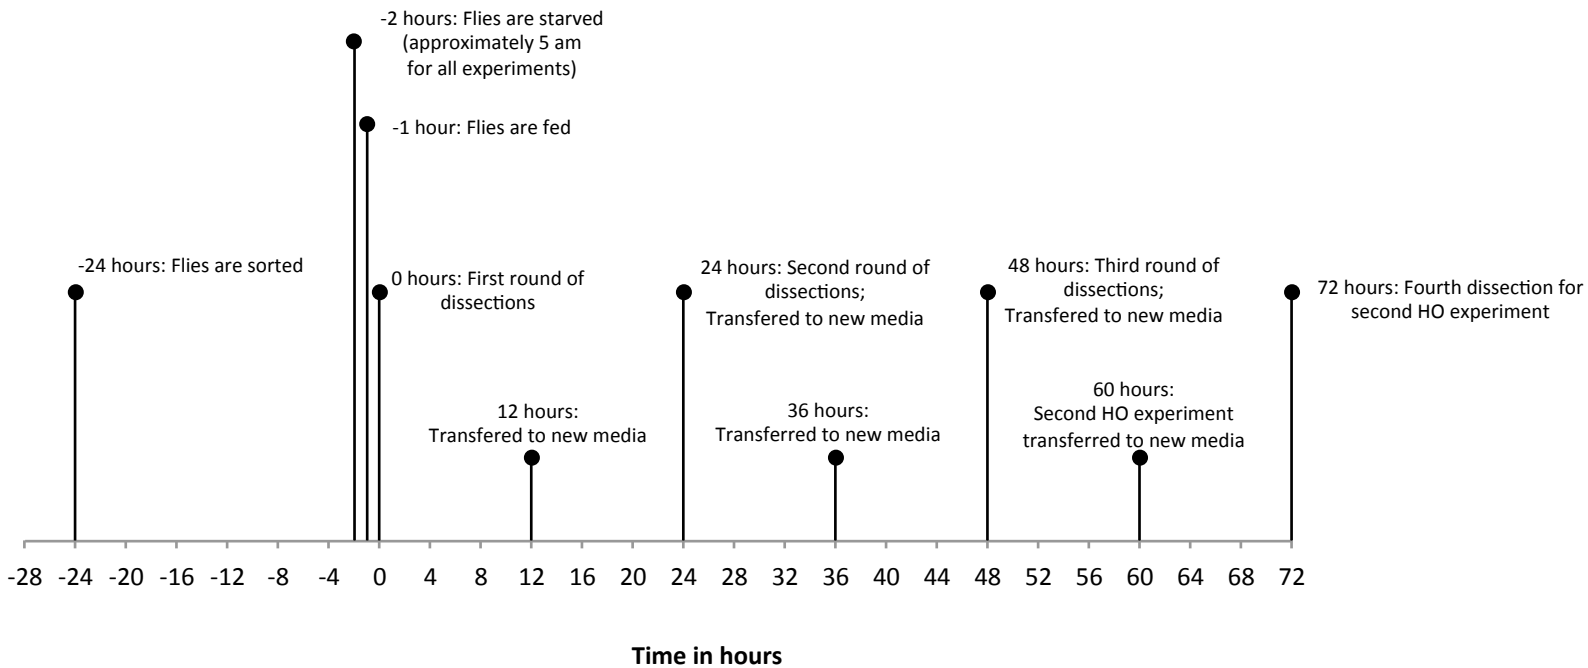

Supplement: FigureS1.pdf [file FigureS1.pdf]
