# Supplementary material for: Interactions between Drosophila and its natural yeast symbionts—Is Saccharomyces cerevisiae a good model for studying the fly-yeast relationship?
Source: PubMed Central journal article supplement (PMC4556146; doi:10.7717/peerj.1116), 2015-08-25

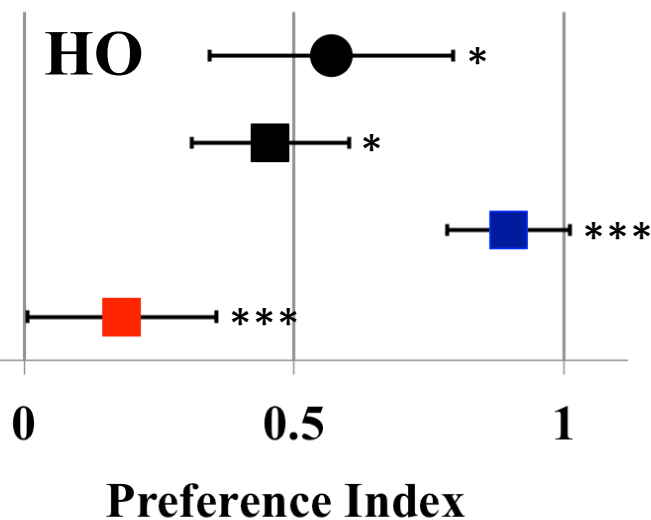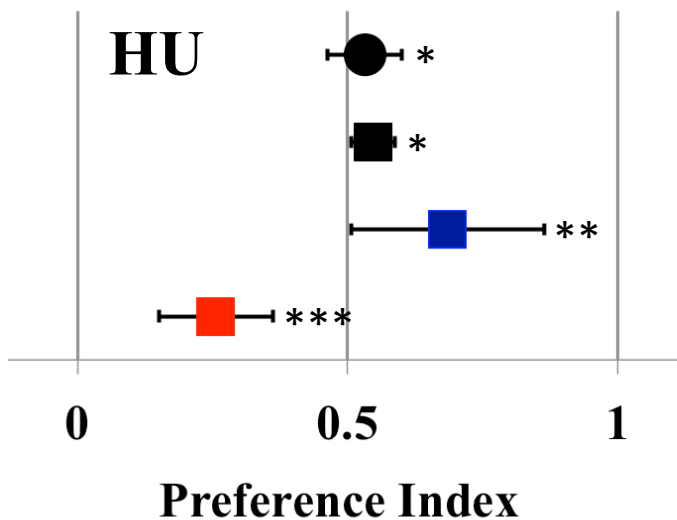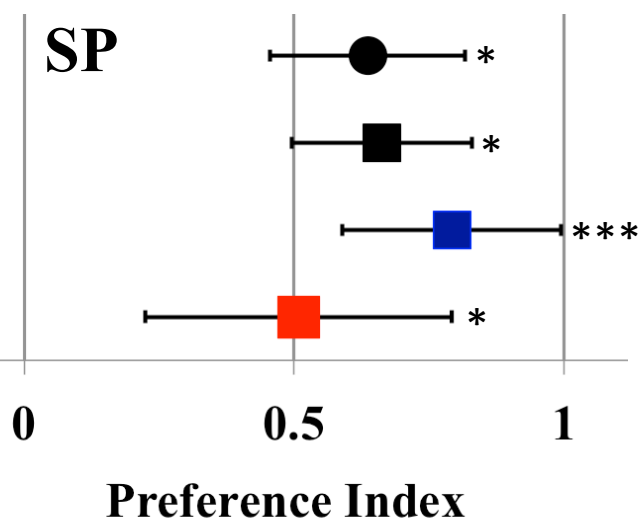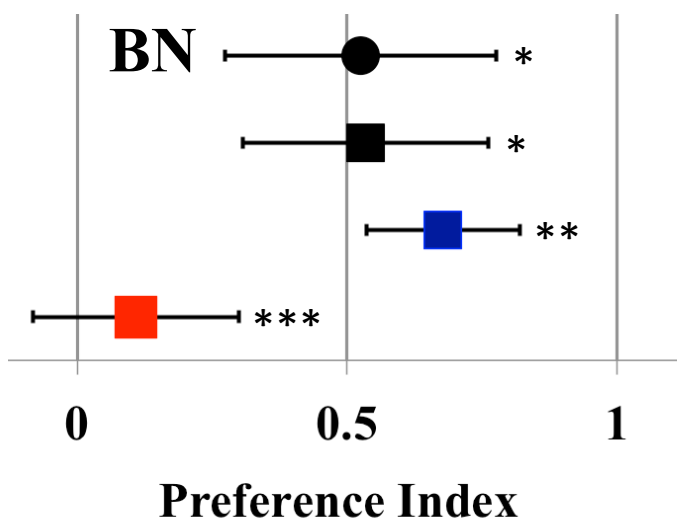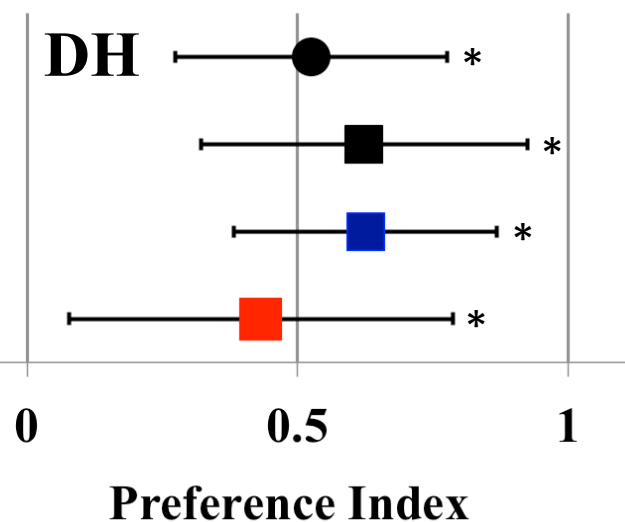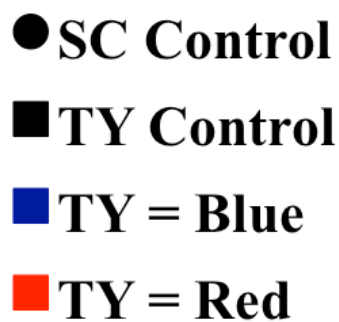

Supplement: peerj-03-1116-s003.pdf [file peerj-03-1116-s003.pdf]
